# Supplementary material for: Feeding sows milk biofortified with n-6 and n-3 modulates immune status of sows and drives positive transgenerational effects
Source: PubMed Central journal article supplement (PMC11349115; doi:10.1371/journal.pone.0306707), 2024-08-27
Supplement: pone.0306707.s001.pdf [file pone.0306707.s001.pdf]

**Feeding sows milk biofortified with n-6 and n-3 modulates immune status of sows and drives positive transgenerational effects**

Authors: Leriana Garcia Reis<sup>1\*,#a</sup>, Vera Letticie de Azevedo Ruiz<sup>2&</sup>, Simone Maria Massami Kitamura<sup>3</sup>, André Furugen Cesar Andrade<sup>4</sup>, Fernando de Oliveira Bussiman<sup>5</sup>, Mirele Daiana Poleti<sup>2</sup>, Juliano Coelho da Silveira<sup>2</sup>, Heidge Fukumasu<sup>2</sup>, Lúcia Helena Faccioli<sup>6</sup>, Cleni Mara Marzocchi-Machado<sup>6</sup>, Ricardo de Francisco Strefezzi<sup>2</sup>, Edna Neves Garcia<sup>3</sup>, Theresa Casey<sup>1</sup>, Arlindo Saran Netto<sup>3,#b</sup>.

Short Title: Biofortified Milk's Immune Modulation in Sows and Transgenerational Benefits with n-6 and n-3

<sup>1</sup>Department of Animal Science, Purdue University, West Lafayette, Indiana, USA.

<sup>2</sup>Department of Veterinary Medicine, School of Animal Science and Food Engineering, University of São Paulo, Pirassununga, SP, Brazil.

<sup>3</sup>Department of Animal Science, School of Animal Science and Food Engineering, University of São Paulo

<sup>4</sup>Department of Animal Reproduction, School of Animal Science and Food Engineering, University of São Paulo

<sup>5</sup>Department of Animal and Dairy Science, University of Georgia, Athens Georgia , USA.

<sup>6</sup>Department of Clinical Analyses, Toxicology and Food Sciences, School of Pharmaceutical Sciences of Ribeirão Preto, University of São Paulo, Ribeirão Preto, SP, Brazil.

<sup>#a</sup>Current address: Department of Animal Science, Purdue University, West Lafayette, Indiana 47907, USA

<sup>#b</sup>Current address: Department of Animal Science, School of Animal Science and Food Engineering, University of São Paulo, Rua Duque de Caxias Norte, 225, 13635-900, Pirassununga, SP, Brazil

\*Corresponding author:

Email: lgarciar@purdue.edu/lerianagarcia@outlook.com (L.G.R.)

Key words: Essential fatty acids. Immune modulation. Maternal nutrition. Piglets. Swine reproductive outcomes.

Table 1. Gene names and primer sequences of liver

| Gene abbreviation <sup>a</sup> | Gene name                                        | Primer sequences (5'-3')                              | GenBank sequence | References                        |
|--------------------------------|--------------------------------------------------|-------------------------------------------------------|------------------|-----------------------------------|
| ACC                            | Acetyl-CoA Carboxylase                           | F: ATGTTTCGGCAGTCCCTGAT<br>R: TGTGGACCAGCTGACCTTGA    | NM_001114269.1   | Chen et al. (2017)                |
| SREBP-1                        | Sterol Regulatory Element-Binding Protein 1      | F: CTACCACAAGCTGCACCAG<br>R: GGGAGACTGGTCTTGACTCG     | NM_214157.1      | Li et al. (2016)                  |
| SCD                            | Stearoyl-CoA Desaturase                          | F: TTGATCCCCACCTGCAAGAT<br>R: CGTGTGGCAATGATCAGGA     | NM_213781.1      | Cirera et al. (2020)              |
| PPAR- $\alpha$                 | Peroxisome Proliferator Activated Receptor Alpha | F: TTCCCTCTTTGTGGCTGCT<br>R: GGGGTGGTGGTCTGCAAG       | NM_001044526.1   | Mentzel et al. (2018)             |
| FADS2                          | Fatty acid desaturase 2                          | F: ACATGAACCTGTTGAGAGC<br>R: TGATGAACTTGTGGACGATG     | NM_001171750.1   | Meadus, et al. (2011)             |
| FAS                            | Fatty Acid Synthase                              | F: GTGGGCTACAGCATGATAGG<br>R: GAATTGCAGCGAGGAGTTAG    | NM_001099930.1   | Meadus, et al. (2011)             |
| HPRT1                          | Hypoxanthine Phosphoribosyltransferase 1         | F: AAGGACCCCTCGAAGTGTTG<br>R: CACAAACATGATTCAAGTCCCTG | NM_001032376.2   | Svobodová, Bílek and Knoll (2008) |
| ACTB                           | $\beta$ -Actin                                   | F: TCTGGCACCACACCTTCT<br>R: TGATCTGGGTCATCTTCTCAC     | NM_021086047.1   | Jiao, et al. (2020)               |

<sup>a</sup>Housekeeping genes: HPRT1 and ACTB.

Table 2. Gene names and primer sequences of ARH

| Gene abbreviation <sup>a</sup> | Gene name                                  | Primer sequences (5'-3')                                  | GenBank sequence | References                        |
|--------------------------------|--------------------------------------------|-----------------------------------------------------------|------------------|-----------------------------------|
| CART                           | Cocaine and Amphetamine-Related Transcript | F: CCGCCCTGCTGCTGCTGCTAC<br>R: AGGACTTGCCATACTTCTTCTC     | NM_001099925.1   | Óvilo et al. (2010)               |
| INSR                           | Insulin Receptor                           | F: AAACGCCAGGGACATCGTCAAGG<br>R: CCGCAGGGAACGCAGGTAACCTCT | XM_021083940.1   | Óvilo et al. (2014)               |
| LEPR                           | Leptin Receptor                            | F: GAAAAACACCGGAATGATGC<br>R: AAAAGAAGAGGGCCAAATGTC       | NM_001024587.1   | Óvilo et al. (2014)               |
| NPY                            | Neuropeptide Y                             | F: TCGGCGTTGAGACATTACATCA<br>R: GTCTCGGGACTAGATCGTTTTCC   | NM_001256367.1   | Óvilo et al. (2010)               |
| HPRT1                          | Hypoxanthine Phosphoribosyltransferase 1   | F: AAGGACCCCTCGAAGTGTTG<br>R: CACAAACATGATTCAAGTCCCTG     | NM_001032376.2   | Svobodová, Bílek and Knoll (2008) |
| ACTB                           | $\beta$ -Actin                             | F: TCTGGCACCACACCTTCT<br>R: TGATCTGGGTCATCTTCTCAC         | NM_021086047.1   | Jiao, et al. (2020)               |

<sup>a</sup>Housekeeping genes: HPRT1 and ACTB.

2

3

4

5

Table 3. Concentration of elaidic acid ( $\mu\text{g}/\text{mL}$ ) at 40 and 107 days of gestation and at 1 and 21 days of lactation of sows

| Treatment | Gestation                                    |                                               | Lactation                                   |                                              |
|-----------|----------------------------------------------|-----------------------------------------------|---------------------------------------------|----------------------------------------------|
|           | D40G <sup>a</sup> ( $\pm$ SEM <sup>b</sup> ) | D107G <sup>a</sup> ( $\pm$ SEM <sup>b</sup> ) | D1L <sup>a</sup> ( $\pm$ SEM <sup>b</sup> ) | D21L <sup>a</sup> ( $\pm$ SEM <sup>b</sup> ) |
| CON       | 2.430 $\pm$ 0.19 <sup>a,B</sup>              | 1.875 $\pm$ 0.18 <sup>a,B</sup>               | 1.725 $\pm$ 0.09 <sup>a,B</sup>             | 8.482 $\pm$ 0.16 <sup>a,A</sup>              |
| n-6       | 3.593 $\pm$ 0.20 <sup>a,A</sup>              | 2.237 $\pm$ 0.18 <sup>a,B</sup>               | 0.903 $\pm$ 0.08 <sup>b,C</sup>             | 5.514 $\pm$ 0.17 <sup>a,A</sup>              |
| n-3       | 3.922 $\pm$ 0.20 <sup>a,B</sup>              | 2.279 $\pm$ 0.18 <sup>a,B</sup>               | 1.782 $\pm$ 0.08 <sup>a,C</sup>             | 8.105 $\pm$ 0.16 <sup>a,A</sup>              |

Average on the same line followed by the same capital letter, do not differ. Averages in the same column followed by the same lowercase letter, do not differ.

<sup>a</sup>D40G: 40 days of gestation; D107G: 107 days of gestation; D1L: first day of lactation; D21L: 21 days of lactation.

<sup>b</sup>SEM, standard error of the mean.

Table 4. Concentration of  $\gamma$ -linolenic acid ( $\mu\text{g}/\text{mL}$ ) at 40 and 107 days of gestation and at 1 and 21 days of lactation of sows

| Treatment | Gestation                                    |                                               | Lactation                                   |                                              |
|-----------|----------------------------------------------|-----------------------------------------------|---------------------------------------------|----------------------------------------------|
|           | D40G <sup>a</sup> ( $\pm$ SEM <sup>b</sup> ) | D107G <sup>a</sup> ( $\pm$ SEM <sup>b</sup> ) | D1L <sup>a</sup> ( $\pm$ SEM <sup>b</sup> ) | D21L <sup>a</sup> ( $\pm$ SEM <sup>b</sup> ) |
| CON       | 3.835 $\pm$ 0.08 <sup>a,B</sup>              | 4.979 $\pm$ 0.10 <sup>a,B</sup>               | 2.686 $\pm$ 0.09 <sup>b,C</sup>             | 7.365 $\pm$ 0.08 <sup>a,A</sup>              |
| n-6       | 4.228 $\pm$ 0.08 <sup>a,B</sup>              | 4.658 $\pm$ 0.11 <sup>a,A</sup>               | 4.425 $\pm$ 0.09 <sup>a,B</sup>             | 6.162 $\pm$ 0.08 <sup>a,A</sup>              |
| n-3       | 3.754 $\pm$ 0.09 <sup>a,B</sup>              | 6.358 $\pm$ 0.10 <sup>a,A</sup>               | 3.216 $\pm$ 0.09 <sup>b,B</sup>             | 5.329 $\pm$ 0.08 <sup>b,A</sup>              |

Average on the same line followed by the same capital letter, do not differ. Averages in the same column followed by the same lowercase letter, do not differ.

<sup>a</sup>D40G: 40 days of gestation; D107G: 107 days of gestation; D1L: first day of lactation; D21L: 21 days of lactation.

<sup>b</sup>SEM, standard error of the mean.

Table 5. ARA/EPA ratio at 40 and 107 days of gestation and at 1 and 21 days of lactation of sows

| Treatment | Gestation                                    |                                               | Lactation                                   |                                              |
|-----------|----------------------------------------------|-----------------------------------------------|---------------------------------------------|----------------------------------------------|
|           | D40G <sup>a</sup> ( $\pm$ SEM <sup>b</sup> ) | D107G <sup>a</sup> ( $\pm$ SEM <sup>b</sup> ) | D1L <sup>a</sup> ( $\pm$ SEM <sup>b</sup> ) | D21L <sup>a</sup> ( $\pm$ SEM <sup>b</sup> ) |
| CON       | 63.264 $\pm$ 7.16 <sup>a,A</sup>             | 59.917 $\pm$ 7.59 <sup>a,A</sup>              | 41.825 $\pm$ 3.04 <sup>a,B</sup>            | 25.339 $\pm$ 4.26 <sup>a,C</sup>             |
| n-6       | 70.146 $\pm$ 7.67 <sup>a,A</sup>             | 47.843 $\pm$ 7.40 <sup>a,B</sup>              | 31.797 $\pm$ 2.69 <sup>b,B</sup>            | 31.222 $\pm$ 4.39 <sup>a,B</sup>             |
| n-3       | 64.069 $\pm$ 7.40 <sup>a,A</sup>             | 29.090 $\pm$ 7.59 <sup>b,B</sup>              | 33.114 $\pm$ 2.86 <sup>b,B</sup>            | 23.872 $\pm$ 4.26 <sup>a,B</sup>             |

Average on the same line followed by the same capital letter, do not differ. Averages in the same column followed by the same lowercase letter, do not differ.

<sup>a</sup>D40G: 40 days of gestation; D107G: 107 days of gestation; D1L: first day of lactation; D21L: 21 days of lactation.

<sup>b</sup>SEM, standard error of the mean.

Table 6. Backfat thickness average (mm) from 40 to 107 days of gestation of gilts

| Treatment | Day                                          |                                               |
|-----------|----------------------------------------------|-----------------------------------------------|
|           | D40G <sup>a</sup> ( $\pm$ SEM <sup>b</sup> ) | D107G <sup>a</sup> ( $\pm$ SEM <sup>b</sup> ) |
| CON       | 15.17 $\pm$ 0.66 <sup>b,A</sup>              | 15.29 $\pm$ 0.45 <sup>a,A</sup>               |
| n-6       | 15.76 $\pm$ 0.66 <sup>b,B</sup>              | 16.41 $\pm$ 0.44 <sup>a,A</sup>               |

24 Average on the same line followed by the same capital letter, do not differ. Averages in the same column followed by  
 25 the same lowercase letter, do not differ.

26 <sup>a</sup>D40G: day 40 of gestation; D107G: day 107 of gestation.

27 <sup>b</sup>SEM, standard error of the mean.

28 Table 7. Triglyceride's concentration (mg.dL<sup>-1</sup>) at 40 and 107 days of gestation and at 1 and 21 days of lactation of  
 29 SOWS

| Treatment | Gestation                               |                                          | Lactation                              |                                         |
|-----------|-----------------------------------------|------------------------------------------|----------------------------------------|-----------------------------------------|
|           | D40G <sup>a</sup> (± SEM <sup>b</sup> ) | D107G <sup>a</sup> (± SEM <sup>b</sup> ) | D1L <sup>a</sup> (± SEM <sup>b</sup> ) | D21L <sup>a</sup> (± SEM <sup>b</sup> ) |
| CON       | 129.00 ± 13.92 <sup>a,A</sup>           | 100.00 ± 13.92 <sup>a,A</sup>            | 24.10 ± 9.84 <sup>a,B</sup>            | 100.40 ± 13.92 <sup>a,A</sup>           |
| n-6       | 95.80 ± 10.81 <sup>a,A</sup>            | 81.40 ± 10.81 <sup>a,A</sup>             | 35.33 ± 8.06 <sup>a,B</sup>            | 67.00 ± 10.81 <sup>b,A</sup>            |
| n-3       | 80.40 ± 9.69 <sup>b,A</sup>             | 105.80 ± 9.69 <sup>a,A</sup>             | 31.11 ± 7.22 <sup>a,B</sup>            | 54.80 ± 9.69 <sup>b,B</sup>             |

30 Average on the same line followed by the same capital letter, do not differ. Averages in the same column followed  
 31 by the same lowercase letter, do not differ.

32 <sup>a</sup>D40G: day 40 of gestation; D107G: day 107 of gestation; D1L: day 1 of lactation; D21L: day 21 of lactation.

33 <sup>b</sup>SEM, standard error of the mean.

34 Table 8. Effects of supplementing biofortified milk in estimated colostrum production of sows and intake of their  
 35 piglets in the first 24 hours

| Item <sup>a</sup> | Treatment <sup>b</sup>    |                           |                           | P-value <sup>d</sup> |       |       |
|-------------------|---------------------------|---------------------------|---------------------------|----------------------|-------|-------|
|                   | CON (± SEM <sup>c</sup> ) | n-6 (± SEM <sup>c</sup> ) | n-3 (± SEM <sup>c</sup> ) | Treatment            | C1    | C2    |
| Production, kg    | 4.867 ± 0.364             | 4.835 ± 0.393             | 4.864 ± 0.556             | 0.998                | 0.984 | 0.954 |
| Intake, g         | 422.943 ± 0.066           | 409.797 ± 0.070           | 397.298 ± 0.072           | 0.827                | 0.581 | 0.756 |

36 <sup>a</sup>Colostrum intake of piglets alive was estimated by the model to predict of Theil et al. (2014) 24 h after the first-born  
 37 piglet. The sum of the individual colostrum intake of each piglet within the litter was used to calculate colostrum  
 38 production of the sow.

39 <sup>b</sup>Sows fed with a Control milk (CON), supplemented with cow's milk biofortified with n-6 or n-3.

40 <sup>c</sup>SEM: standard error of the mean.

41 <sup>d</sup>C1, contrast Control vs n-6+n-3; C2, contrast n-6 vs n-3.

42 Table 9. Histological characteristics of the *Longissimus dorsi* muscle from gilts at 28 days of gestation – batch B

| Item <sup>a</sup>    | Treatment <sup>b</sup>    |                           |                           | P-value <sup>d</sup> |       |       |
|----------------------|---------------------------|---------------------------|---------------------------|----------------------|-------|-------|
|                      | CON (± SEM <sup>c</sup> ) | n-6 (± SEM <sup>c</sup> ) | n-3 (± SEM <sup>c</sup> ) | Treatment            | C1    | C2    |
| Adipose cells        |                           |                           |                           |                      |       |       |
| Area, µm             | 1806.480 ± 226.140        | 2250.370 ± 225.620        | 2195.670 ± 214.750        | 0.321                | 0.135 | 0.862 |
| Maximum diameter, µm | 63.266 ± 2.897            | 67.845 ± 2.909            | 67.819 ± 2.753            | 0.436                | 0.200 | 0.995 |

|                                 |                        |                        |                        |       |       |       |
|---------------------------------|------------------------|------------------------|------------------------|-------|-------|-------|
| Minimum diameter, $\mu\text{m}$ | $35.097 \pm 2.238$     | $38.107 \pm 2.247$     | $38.648 \pm 2.127$     | 0.477 | 0.233 | 0.863 |
| Medium diameter, $\mu\text{m}$  | $47.816 \pm 2.475$     | $51.605 \pm 2.486$     | $51.763 \pm 2.352$     | 0.441 | 0.204 | 0.964 |
| Per-area, %                     | $0.220 \pm 0.024$      | $0.270 \pm 0.024$      | $0.255 \pm 0.023$      | 0.327 | 0.152 | 0.648 |
| Muscle fiber                    |                        |                        |                        |       |       |       |
| Area, $\mu\text{m}^2$           | $4396.880 \pm 737.560$ | $5265.260 \pm 755.280$ | $4542.460 \pm 780.220$ | 0.413 | 0.364 | 0.329 |
| Maximum diameter, $\mu\text{m}$ | $88.693 \pm 6.062$     | $104.200 \pm 6.124$    | $92.680 \pm 6.169$     | 0.187 | 0.197 | 0.197 |
| Minimum diameter, $\mu\text{m}$ | $57.750 \pm 4.732$     | $62.934 \pm 4.842$     | $58.452 \pm 5.001$     | 0.466 | 0.418 | 0.352 |
| Medium diameter, $\mu\text{m}$  | $72.201 \pm 6.200$     | $80.194 \pm 6.342$     | $74.028 \pm 6.559$     | 0.358 | 0.297 | 0.324 |
| Per-area, %                     | $0.345 \pm 0.028$      | $0.381 \pm 0.028$      | $0.396 \pm 0.028$      | 0.429 | 0.217 | 0.698 |

43 <sup>a</sup>Per-area: percentage of the area filled by the object delimited within the total image, as a way of quantifying the

44 relative area.

45 <sup>b</sup>Gilts fed with a Control milk (CON), supplemented with cow's milk biofortified with n-6 or n-3.

46 <sup>c</sup>SEM: standard error of the mean.

47 <sup>d</sup>C1, contrast Control vs n-6+n-3; C2, contrast n-6 vs n-3.

Table 10. Histological characteristics of the *Longissimus dorsi* muscle from 14 day-old piglets – batch A

| Item <sup>a</sup>    | Treatment <sup>b</sup>    |                           |                           | P-value <sup>d</sup> |        |           |       |       |
|----------------------|---------------------------|---------------------------|---------------------------|----------------------|--------|-----------|-------|-------|
|                      | CON (± SEM <sup>c</sup> ) | n-6 (± SEM <sup>c</sup> ) | n-3 (± SEM <sup>c</sup> ) | Sex                  | Weight | Treatment | C1    | C2    |
| Adipose cells        |                           |                           |                           |                      |        |           |       |       |
| Area, μm             | 841.240 ± 2.760           | 883.790 ± 2.760           | 1076.050 ± 2.770          | 0.006                | 0.006  | 0.210     | 0.245 | 0.182 |
| Maximum diameter, μm | 43.633 ± 2.087            | 44.638 ± 2.222            | 48.222 ± 2.494            | 0.123                | 0.004  | 0.265     | 0.260 | 0.227 |
| Minimum diameter, μm | 25.108 ± 1.432            | 25.797 ± 1.510            | 28.841 ± 1.717            | 0.013                | 0.004  | 0.152     | 0.196 | 0.134 |
| Medium diameter, μm  | 33.701 ± 1.722            | 34.555 ± 1.823            | 37.808 ± 2.054            | 0.035                | 0.003  | 0.206     | 0.225 | 0.182 |
| Per-area, %          | 0.098 ± 0.029             | 0.098 ± 0.029             | 0.114 ± 0.029             | 0.065                | <0.001 | 0.522     | 0.580 | 0.318 |
| Muscle fiber         |                           |                           |                           |                      |        |           |       |       |
| Area, μm             | 250.61 ± 0.10             | 240.51 ± 0.10             | 284.72 ± 0.12             | 0.830                | 0.002  | 0.405     | 0.688 | 0.192 |
| Maximum diameter, μm | 21.606 ± 0.048            | 21.276 ± 0.049            | 23.257 ± 0.060            | 0.980                | 0.002  | 0.414     | 0.637 | 0.208 |
| Minimum diameter, μm | 13.980 ± 0.038            | 13.776 ± 0.040            | 14.765 ± 0.048            | 0.576                | 0.003  | 0.448     | 0.679 | 0.221 |
| Medium diameter, μm  | 17.653 ± 0.045            | 17.262 ± 0.048            | 18.769 ± 0.056            | 0.848                | 0.001  | 0.427     | 0.722 | 0.203 |
| Per-area, %          | 0.030 ± 0.001             | 0.029 ± 0.001             | 0.034 ± 0.001             | 0.949                | 0.003  | 0.444     | 0.626 | 0.232 |

<sup>a</sup>Per-area: percentage of the area filled by the object delimited within the total image, as a way of quantifying the relative area.

<sup>b</sup>Sows fed with a Control milk (CON), supplemented with cow's milk biofortified with n-6 or n-3.

<sup>c</sup>SEM: standard error of the mean.

<sup>d</sup>C1, contrast Control vs n-6+n-3; C2, contrast n-6 vs n-3.

Table 11. Liver expression levels of genes involved in lipid metabolism in gilts from control, n-6 and n-3 groups – batch B

| Item           | Treatment <sup>a</sup>        |                                |                                | P-value <sup>c</sup> |       |       |
|----------------|-------------------------------|--------------------------------|--------------------------------|----------------------|-------|-------|
|                | TC ( $\pm$ SEM <sup>b</sup> ) | n-6 ( $\pm$ SEM <sup>b</sup> ) | n-3 ( $\pm$ SEM <sup>b</sup> ) | Treat                | C1    | C2    |
| ACC            | 1.084 $\pm$ 0.212             | 1.049 $\pm$ 0.268              | 1.143 $\pm$ 0.212              | 0.959                | 0.963 | 0.786 |
| D6D            | 1.325 $\pm$ 0.326             | 1.674 $\pm$ 0.412              | 0.966 $\pm$ 0.326              | 0.414                | 0.991 | 0.195 |
| FAS            | 1.308 $\pm$ 0.454             | 1.994 $\pm$ 0.525              | 1.786 $\pm$ 0.428              | 0.589                | 0.317 | 0.762 |
| SCD            | 1.487 $\pm$ 0.461             | 1.114 $\pm$ 0.532              | 1.170 $\pm$ 0.435              | 0.475                | 0.495 | 0.358 |
| PPAR- $\alpha$ | 1.028 $\pm$ 0.123             | 0.933 $\pm$ 0.155              | 0.889 $\pm$ 0.116              | 0.710                | 0.462 | 0.822 |
| SREBP-1        | 1.131 $\pm$ 0.681             | 2.594 $\pm$ 0.786              | 0.893 $\pm$ 0.681              | 0.235                | 0.868 | 0.093 |

<sup>a</sup>Gilts fed with a Control milk (CON), supplemented with cow's milk biofortified with n-6 or n-3.

<sup>b</sup>SEM: standard error of the mean.

<sup>c</sup>C1, contrast Control vs n-6+n-3; C2, contrast n-6 vs n-3.

Table 12. Relative expression of genes in the gilt hypothalamus supplemented with milk biofortified with PUFA n-6 and n-3

| Item | Treatment <sup>a</sup>        |                                |                                | P-value <sup>c</sup> |       |       |
|------|-------------------------------|--------------------------------|--------------------------------|----------------------|-------|-------|
|      | TC ( $\pm$ SEM <sup>b</sup> ) | n-6 ( $\pm$ SEM <sup>b</sup> ) | n-3 ( $\pm$ SEM <sup>b</sup> ) | Treat                | C1    | C2    |
| CART | 6.198 $\pm$ 2.445             | 3.439 $\pm$ 2.445              | 3.010 $\pm$ 2.305              | 0.986                | 0.895 | 0.926 |
| INSR | 1.134 $\pm$ 0.181             | 0.637 $\pm$ 0.169              | 1.008 $\pm$ 0.159              | 0.130                | 0.163 | 0.125 |
| LEPR | 1.842 $\pm$ 0.787             | 1.188 $\pm$ 0.736              | 1.316 $\pm$ 0.787              | 0.794                | 0.631 | 0.652 |
| NPY  | 2.409 $\pm$ 0.873             | 2.211 $\pm$ 0.873              | 2.025 $\pm$ 0.823              | 0.920                | 0.739 | 0.812 |

<sup>a</sup>Gilts fed with a Control milk (CON), supplemented with cow's milk biofortified with n-6 or n-3.

<sup>b</sup>SEM: standard error of the mean.

<sup>c</sup>C1, contrast Control vs n-6+n-3; C2, contrast n-6 vs n-3.

Table 13. Hemolytic activity of the alternative pathway of the complement system for swine females and piglets

| Item                        | Treatment <sup>a</sup>         |                                |                                | P-value <sup>c</sup> |                  |                  |
|-----------------------------|--------------------------------|--------------------------------|--------------------------------|----------------------|------------------|------------------|
|                             | CON ( $\pm$ SEM <sup>b</sup> ) | n-6 ( $\pm$ SEM <sup>b</sup> ) | n-3 ( $\pm$ SEM <sup>b</sup> ) | Treat                | C1               | C2               |
| T1/2 Sow batch. A           | 6.942 $\pm$ 0.156              | 5.966 $\pm$ 0.140              | 4.880 $\pm$ 0.156              | <b>&lt;0.001</b>     | <b>&lt;0.001</b> | <b>&lt;0.001</b> |
| $\Delta$ OD Piglet batch. A | 0.088 $\pm$ 0.028              | 0.088 $\pm$ 0.028              | 0.050 $\pm$ 0.037              | 0.680                | 0.613            | 0.4343           |
| T1/2 Sow batch. B           | 6.841 $\pm$ 0.31               | 5.752 $\pm$ 0.306              | 5.774 $\pm$ 0.288              | <b>0.028</b>         | <b>0.008</b>     | 0.959            |

<sup>a</sup>Sows fed with a Control milk (CON), supplemented with cow's milk biofortified with n-6 or n-3.

<sup>b</sup>SEM: standard error of the mean.

<sup>c</sup>C1, contrast Control vs n-6+n-3; C2, contrast n-6 vs n-3.

Table 14. Concentration of IgM (mg.mL<sup>-1</sup>) at 40, 75 and 107 days of gestation and at 1 and 21 days of lactation of sows

| Treatment | Gestation                                    |                                              |                                               | Lactation                                   |                                              |
|-----------|----------------------------------------------|----------------------------------------------|-----------------------------------------------|---------------------------------------------|----------------------------------------------|
|           | D40G <sup>a</sup> ( $\pm$ SEM <sup>b</sup> ) | D75G <sup>a</sup> ( $\pm$ SEM <sup>b</sup> ) | D107G <sup>a</sup> ( $\pm$ SEM <sup>b</sup> ) | D1L <sup>a</sup> ( $\pm$ SEM <sup>b</sup> ) | D21L <sup>a</sup> ( $\pm$ SEM <sup>b</sup> ) |

|     |                    |                    |                    |                    |                     |
|-----|--------------------|--------------------|--------------------|--------------------|---------------------|
| CON | 15.793 ± 4.123 a,B | 14.332 ± 4.123 a,B | 16.373 ± 4.123 a,B | 29.405 ± 4.123 a,A | 20.038 ± 4.123 a,AB |
| n-6 | 18.711 ± 3.934 a,A | 20.083 ± 3.987 a,A | 20.942 ± 4.225 a,A | 19.838 ± 3.987 a,A | 23.351 ± 3.987 a,A  |
| n-3 | 15.952 ± 4.123 a,B | 14.863 ± 4.123 a,B | 17.271 ± 4.123 a,B | 17.529 ± 4.123 a,B | 27.032 ± 4.123 a,A  |

Average on the same line followed by the same capital letter, do not differ. Averages in the same column followed by the same lowercase letter, do not differ.

<sup>a</sup>D40G: 40 days of gestation; D75G: 75 days of gestation; D107G: 107 days of gestation; D1L: first day of lactation; D21L: 21 days of lactation.

<sup>b</sup>SEM, standard error of the mean.

Table 15. Concentration of TNF- $\alpha$  (pg.mL<sup>-1</sup>) at 40, 75 and 107 days of gestation and at 1 and 21 days of lactation of sows

| Treatment | Gestation                               |                                         |                                          | Lactation                              |                                         |
|-----------|-----------------------------------------|-----------------------------------------|------------------------------------------|----------------------------------------|-----------------------------------------|
|           | D40G <sup>a</sup> (± SEM <sup>b</sup> ) | D75G <sup>a</sup> (± SEM <sup>b</sup> ) | D107G <sup>a</sup> (± SEM <sup>b</sup> ) | D1L <sup>a</sup> (± SEM <sup>b</sup> ) | D21L <sup>a</sup> (± SEM <sup>b</sup> ) |
| CON       | 32.927 ± 5.376 a,A                      | 30.057 ± 5.376 a,A                      | 37.482 ± 5.376 a,A                       | 22.580 ± 6.191 b,A                     | 22.102 ± 5.376 a,A                      |
| n-6       | 38.544 ± 4.802 a,A                      | 35.048 ± 4.806 a,A                      | 37.403 ± 5.363 a,A                       | 23.122 ± 4.806 b,A                     | 24.078 ± 4.806 a,A                      |
| n-3       | 26.040 ± 5.376 a,B                      | 40.827 ± 5.376 a,AB                     | 29.369 ± 6.191 a,AB                      | 56.531 ± 6.191 a,A                     | 33.560 ± 5.376 a,AB                     |

Average on the same line followed by the same capital letter, do not differ. Averages in the same column followed by the same lowercase letter, do not differ.

<sup>a</sup>D40G: 40 days of gestation; D75G: 75 days of gestation; D107G: 107 days of gestation; D1L: first day of lactation; D21L: 21 days of lactation.

<sup>b</sup>SEM, standard error of the mean.

Table 16. Concentration of IgG (mg.mL<sup>-1</sup>) at 1 and 14 days of lactation in plasma of piglets

| Treatment | Day                                    |                                         |
|-----------|----------------------------------------|-----------------------------------------|
|           | D1L <sup>a</sup> (± SEM <sup>b</sup> ) | D14L <sup>a</sup> (± SEM <sup>b</sup> ) |
| CON       | 27.375 ± 17.831 a,B                    | 160.69 ± 18.813 b,A                     |
| n-6       | 25.441 ± 17.831 a,B                    | 262.69 ± 18.813 a,A                     |
| n-3       | 21.867 ± 17.831 a,B                    | 113.65 ± 17.831 c,A                     |

Average on the same line followed by the same capital letter, do not differ. Averages in the same column followed by the same lowercase letter, do not differ.

<sup>a</sup>D1L: 1 day of lactation; D14L: 14 days of lactation.

<sup>b</sup>SEM, standard error of the mean.

Table 17. Concentration of IgM (mg.mL<sup>-1</sup>) at 1 and 14 days of lactation in plasma of piglets

| Treatment | Day                                    |                                         |
|-----------|----------------------------------------|-----------------------------------------|
|           | D1L <sup>a</sup> (± SEM <sup>b</sup> ) | D14L <sup>a</sup> (± SEM <sup>b</sup> ) |
| CON       | 2.988 ± 0.940 a,B                      | 6.358 ± 0.992 b,A                       |
| n-6       | 0.812 ± 0.940 b,B                      | 10.295 ± 0.992 a,A                      |
| n-3       | 0.989 ± 0.940 b,B                      | 7.395 ± 0.992 ab,A                      |



87 Average on the same line followed by the same capital letter, do not differ. Averages in the same column followed by  
88 the same lowercase letter, do not differ.

89 <sup>a</sup>D1L: 1 day of lactation; D14L: 14 days of lactation.

90 <sup>b</sup>SEM, standard error of the mean

Table 18. Plasma concentrations of LTB4, PGF2 $\alpha$  and TXB2 in sows at 13  $\pm$  4 days of lactation

| Item <sup>a</sup>                   | Treatment <sup>b</sup>         |                                |                                |                       |                    | P-value <sup>d</sup> |          |           |       |       |
|-------------------------------------|--------------------------------|--------------------------------|--------------------------------|-----------------------|--------------------|----------------------|----------|-----------|-------|-------|
|                                     | CON ( $\pm$ SEM <sup>c</sup> ) | n-6 ( $\pm$ SEM <sup>c</sup> ) | n-3 ( $\pm$ SEM <sup>c</sup> ) | TAP                   | DMSO               | Treat                | Stimulus | Treat*Sti | C1    | C2    |
| LTB4, pg.mL <sup>-1</sup>           | 580.281 $\pm$ 213.378          | 647.393 $\pm$ 197.550          | 448.515 $\pm$ 261.334          | 558.729 $\pm$ 130.321 | n.e.               | 0.879                | n.e.     | n.e.      | 0.715 | 0.723 |
| PGF2 $\alpha$ , pg.mL <sup>-1</sup> | 46.911 $\pm$ 36.291            | 57.158 $\pm$ 28.111            | 41.504 $\pm$ 38.936            | 72.363 $\pm$ 19.754   | n.e.               | 0.390                | 0.063    | 0.302     | n.e.  | 0.463 |
| TXB2, pg.mL <sup>-1</sup>           | 20.266 $\pm$ 24.119            | 38.421 $\pm$ 26.554            | 58.128 $\pm$ 43.023            | 74.793 $\pm$ 18.777   | 3.084 $\pm$ 32.280 | 0.847                | 0.0001   | 0.922     | 0.908 | 0.580 |

<sup>a</sup>Analytes present in greater evidence in the sample

<sup>b</sup>Sows fed with a Control milk (CON), supplemented with cow's milk biofortified with n-6 or n-3.

<sup>c</sup>SEM: standard error of the mean.

<sup>d</sup>C1, contrast Control vs n-6+n-3; C2, contrast n-6 vs n-3.

n.e: not estimable. The values were not estimable due to missing, as a consequence of the limitations of the method to measure the concentration of analytes in the sample.

Table 19. Plasma concentrations of LTB4, PGF2 $\alpha$  and TXB2 in piglets at 13  $\pm$  4 days of age

| Item <sup>a</sup>                   | Treatment <sup>b</sup>         |                                |                                |                       |                    | P-value <sup>d</sup> |          |           |       |       |
|-------------------------------------|--------------------------------|--------------------------------|--------------------------------|-----------------------|--------------------|----------------------|----------|-----------|-------|-------|
|                                     | CON ( $\pm$ SEM <sup>c</sup> ) | n-6 ( $\pm$ SEM <sup>c</sup> ) | n-3 ( $\pm$ SEM <sup>c</sup> ) | TAP                   | DMSO               | Treat                | Stimulus | Treat*Sti | C1    | C2    |
| LTB4, pg.mL <sup>-1</sup>           | 257.400 $\pm$ 205.240          | 498.349 $\pm$ 229.466          | 568.989 $\pm$ 458.931          | 441.579 $\pm$ 184.209 | n.e.               | 0.625                | n.e.     | n.e.      | 0.472 | 0.551 |
| PGF2 $\alpha$ , pg.mL <sup>-1</sup> | 48.433 $\pm$ 126.229           | 278.644 $\pm$ 105.937          | 75.158 $\pm$ 180.405           | 147.565 $\pm$ 86.231  | n.e.               | 0.913                | 0.176    | n.e.      | n.e.  | n.e.  |
| TXB2, pg.mL <sup>-1</sup>           | 45.245 $\pm$ 6.095             | 31.884 $\pm$ 5.220             | 76.663 $\pm$ 7.869             | 88.2901 $\pm$ 5.502   | 14.238 $\pm$ 5.086 | 0.608                | <0.0001  | 0.094     | 0.347 | 0.796 |

<sup>a</sup>Analytes present in greater evidence in the sample

<sup>b</sup>Sows fed with a Control milk (CON), supplemented with cow's milk biofortified with n-6 or n-3.

<sup>c</sup>SEM: standard error of the mean.

<sup>d</sup>C1, contrast Control vs n-6+n-3; C2, contrast n-6 vs n-3.

n.e: not estimable. The values were not estimated due to missing, as a consequence of the limitations of the method to measure the concentration of analytes in the sample.

Table 20. Plasma concentrations of LTB<sub>4</sub>, PGF<sub>2</sub> $\alpha$  and TXB<sub>2</sub> in gilts at 24  $\pm$  6 days of gestation

| Item <sup>a</sup>                               | Treatment <sup>b</sup>         |                                |                                |                       |                      |       | P-value <sup>d</sup> |           |       |       |
|-------------------------------------------------|--------------------------------|--------------------------------|--------------------------------|-----------------------|----------------------|-------|----------------------|-----------|-------|-------|
|                                                 | CON ( $\pm$ SEM <sup>c</sup> ) | n-6 ( $\pm$ SEM <sup>c</sup> ) | n-3 ( $\pm$ SEM <sup>c</sup> ) | TAP                   | DMSO                 | Trat  | Stimulus             | Treat*Sti | C1    | C2    |
| LTB <sub>4</sub> , pg.mL <sup>-1</sup>          | 240.085 $\pm$ 324.069          | 330.581 $\pm$ 330.016          | 129.152 $\pm$ 322.062          | 403.904 $\pm$ 129.271 | 62.641 $\pm$ 352.802 | 0.465 | 0.037                | 0.784     | 0.359 | 0.414 |
| PGF <sub>2</sub> $\alpha$ , pg.mL <sup>-1</sup> | 26.425 $\pm$ 18.191            | 72.973 $\pm$ 18.191            | 22.171 $\pm$ 24.255            | 31.180 $\pm$ 9.902    | 49.866 $\pm$ 21.391  | 0.403 | 0.890                | 0.110     | 0.960 | 0.183 |
| TXB <sub>2</sub> , pg.mL <sup>-1</sup>          | 11.924 $\pm$ 4.755             | 7.042 $\pm$ 4.842              | 16.615 $\pm$ 3.381             | 19.852 $\pm$ 2.606    | 3.8685 $\pm$ 4.331   | 0.139 | <0.0001              | 0.550     | 0.114 | 0.212 |

<sup>a</sup>Analytes present in greater evidence in the sample.

<sup>b</sup>Gilts fed with a Control milk (CON), supplemented with cow's milk biofortified with n-6 or n-3.

<sup>c</sup>SEM: standard error of the mean.

<sup>d</sup>C1, contrast Control vs n-6+n-3; C2, contrast n-6 vs n-3.
